# Supplementary material for: Identification of Newcastle disease virus subgenotype VII.2 in wild birds in Turkey
Source: PubMed Central journal article supplement (PMC7414739; doi:10.1186/s12917-020-02503-3), 2020-08-08
Supplement: 12917_2020_2503_MOESM3_ESM.pdf [file 12917_2020_2503_MOESM3_ESM.pdf]

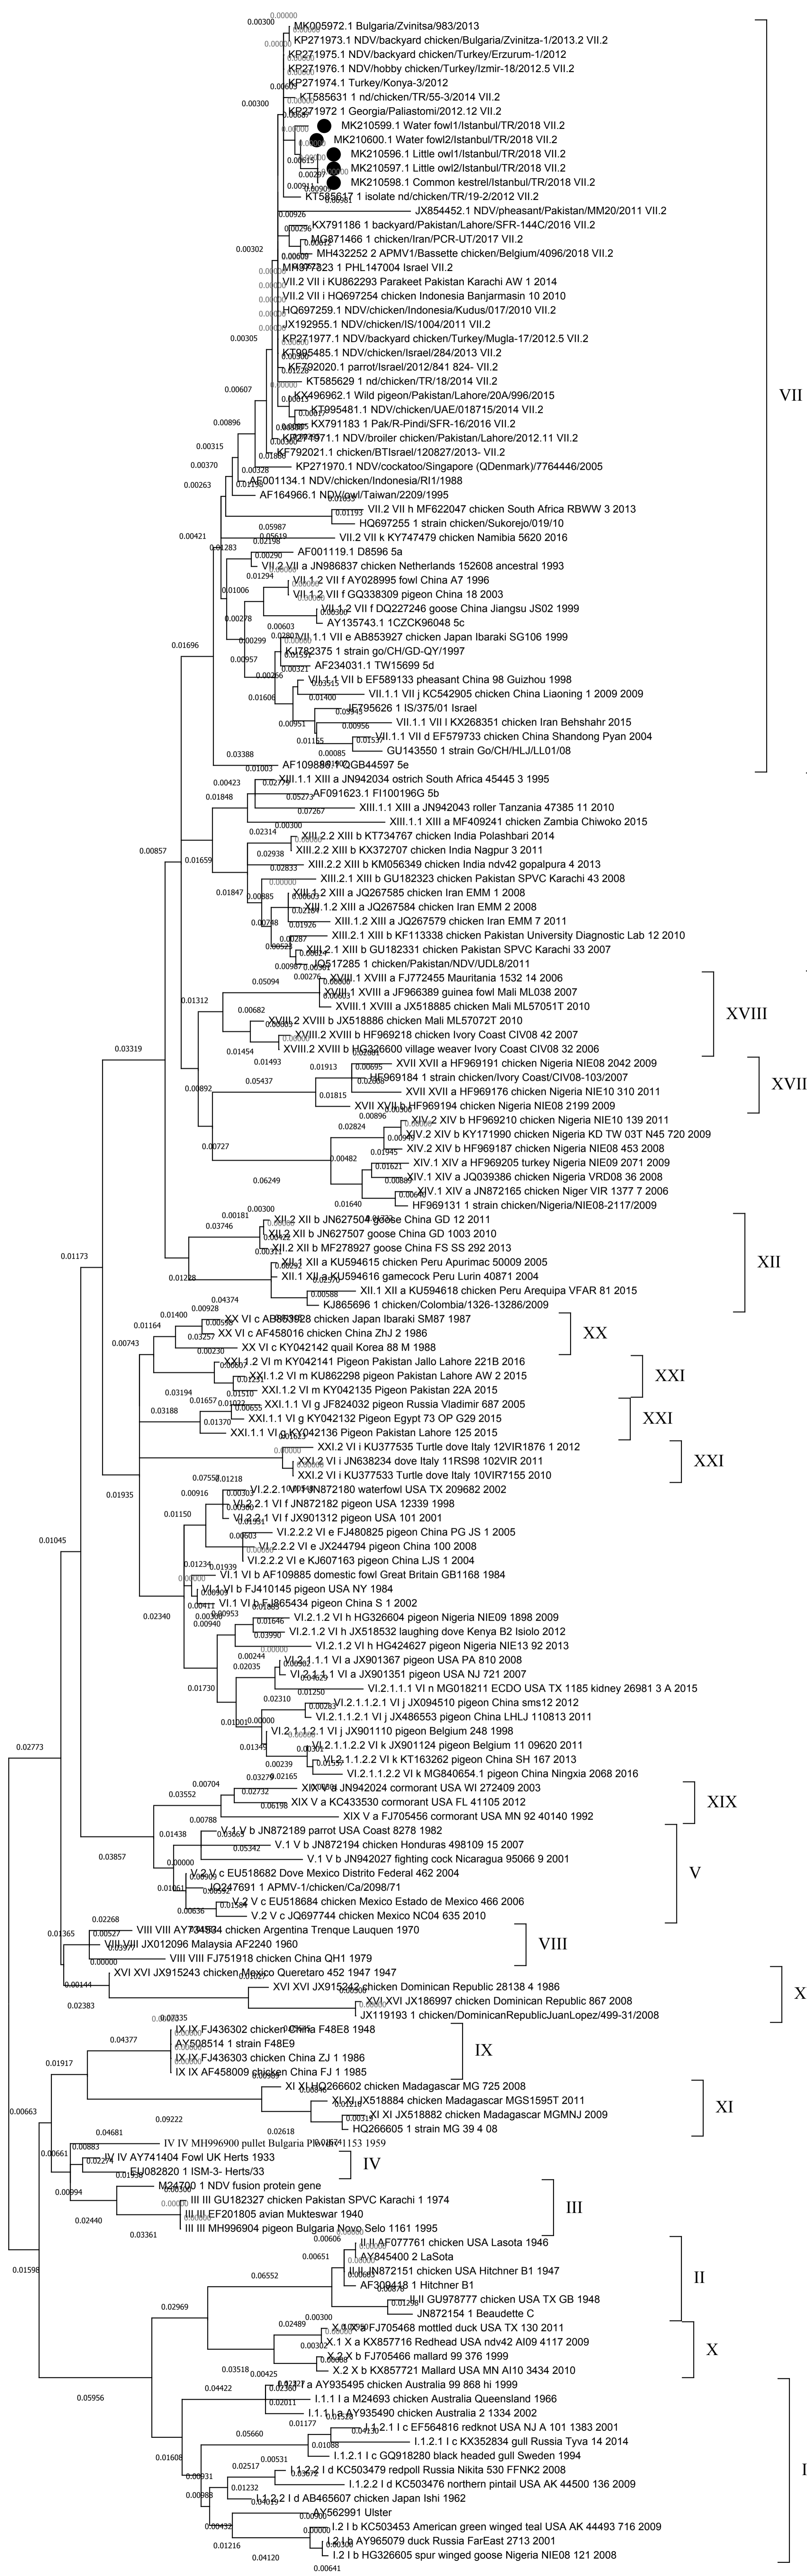

VII

XIII

XVIII

XVII

XIV

XII

XX

XXI

XXI

XXI

XIX

V

VI

VIII

XVI

IX

XI

IV

III

II

X

I

0.050
